# Supplementary material for: Sulforaphane Delays Fibroblast Senescence by Curbing Cellular Glucose Uptake, Increased Glycolysis, and Oxidative Damage
Source: Hindawi journal article supplement (doi:10.1155/2018/5642148), 2018-01-01
Supplement: f1 [file 5642148.f1.pdf]

**Supplementary figures and tables**

**Sulforaphane delays fibroblast senescence by curbing cellular glucose uptake, increased glycolysis and oxidative damage**

Florence Hariton,<sup>1†</sup> Mingzhan Xue,<sup>1†</sup> Naila Rabbani<sup>1</sup>, Mark Fowler<sup>2</sup> and Paul J. Thornalley<sup>1</sup>

TABLE S1: Transcriptomic analysis of genes with changed expression in senescence of MRC-5 fibroblasts *in vitro*.

| No  | Gene ID  | Name                                                                            | P-value | $\Delta\text{Log}_2$ expression |
|-----|----------|---------------------------------------------------------------------------------|---------|---------------------------------|
| 1.  | NR5A2    | Nuclear receptor subfamily 5 group A member 2                                   | 0.043   | 6.83                            |
| 2.  | NPY      | Pro-neuropeptide Y                                                              | 0.022   | 6.50                            |
| 3.  | DNAJC6   | Putative tyrosine-protein phosphatase auxilin                                   | 0.002   | 6.41                            |
| 4.  | APBB1IP  | Amyloid beta A4 precursor protein-binding family B member 1-interacting protein | 0.007   | 5.91                            |
| 5.  | ATCAY    | Caytaxin                                                                        | 0.019   | 5.91                            |
| 6.  | ACKR4    | Atypical chemokine receptor 4                                                   | 0.003   | 5.64                            |
| 7.  | TRIM63   | E3 ubiquitin-protein ligase                                                     | 0.012   | 5.26                            |
| 8.  | PDE11A   | Dual 3',5'-cyclic-AMP and -GMP phosphodiesterase 11A                            | 0.044   | 5.18                            |
| 9.  | FOXL2    | Forkhead box protein L2                                                         | 0.029   | 5.01                            |
| 10. | HSD17B6  | 17-beta-hydroxysteroid dehydrogenase type 6                                     | 0.044   | 4.68                            |
| 11. | LYPD5    | Ly6/PLAUR domain-containing protein 5                                           | 0.020   | 4.43                            |
| 12. | TMEM176A | Transmembrane protein 176A                                                      | 0.020   | 4.39                            |
| 13. | C11orf70 | Uncharacterized protein C11orf70                                                | 0.000   | 3.87                            |
| 14. | MMP3     | Matrix metalloproteinase-3                                                      | 0.010   | 3.77                            |
| 15. | SELENOP  | Selenoprotein P                                                                 | 0.037   | 3.63                            |
| 16. | BANK1    | B-cell scaffold protein with ankyrin repeats                                    | 0.003   | 3.53                            |
| 17. | RGS16    | Regulator of G-protein signaling 16                                             | 0.011   | 3.23                            |
| 18. | CPPED1   | Serine/threonine-protein phosphatase CPPED1                                     | 0.003   | 3.10                            |
| 19. | LRRC69   | Leucine-rich repeat-containing protein 69                                       | 0.005   | 2.97                            |
| 20. | SYPL2    | Synaptophysin-like protein 2                                                    | 0.034   | 2.92                            |
| 21. | PPP1R3G  | Protein phosphatase 1 regulatory subunit 3G                                     | 0.013   | 2.78                            |
| 22. | TMEM47   | Transmembrane protein 47                                                        | 0.044   | 2.69                            |
| 23. | SLC14A1  | Urea transporter 1                                                              | 0.009   | 2.57                            |
| 24. | DAP      | Death-associated protein 1                                                      | 0.048   | 2.49                            |
| 25. | STYK1    | Aspartyl aminopeptidase                                                         | 0.017   | 2.39                            |
| 26. | D4S234E  | Tyrosine-protein kinase STYK1                                                   | 0.022   | 2.33                            |
| 27. | INA      | Alpha-internexin                                                                | 0.031   | 2.18                            |
| 28. | GMFG     | Glia maturation factor gamma                                                    | 0.007   | 2.08                            |
| 29. | MATN3    | Matrilin-3                                                                      | 0.037   | 1.97                            |
| 30. | PSG1     | Pregnancy-specific beta-1-glycoprotein 1                                        | 0.040   | 1.96                            |
| 31. | SHC4     | SHC-transforming protein 4                                                      | 0.040   | 1.95                            |
| 32. | DAAM2    | Disheveled-associated activator of morphogenesis 2                              | 0.028   | 1.95                            |
| 33. | MOB4     | MOB-like protein phocein                                                        | 0.000   | 1.81                            |
| 34. | PDK2     | Pyruvate dehydrogenase kinase, isoenzyme 2                                      | 0.038   | 1.73                            |
| 35. | SORT1    | Sortilin 1                                                                      | 0.035   | 1.69                            |
| 36. | PSG9     | Pregnancy-specific beta-1-glycoprotein 9                                        | 0.048   | 1.68                            |

TABLE S1: Transcriptomic analysis of genes with changed expression in senescence of MRC-5 fibroblasts *in vitro* (cont'd).

| No  | Gene ID  | Name                                                                  | P-value | $\Delta\text{Log}_2$ expression |
|-----|----------|-----------------------------------------------------------------------|---------|---------------------------------|
| 37. | MAP7D3   | MAP7 domain-containing protein 3                                      | 0.049   | 1.66                            |
| 38. | GPC4     | Glypican-4                                                            | 0.016   | 1.60                            |
| 39. | KCTD12   | Pfetin                                                                | 0.016   | 1.58                            |
| 40. | UHMK1    | Serine/threonine-protein kinase Kist                                  | 0.007   | 1.50                            |
| 41. | MANBAL   | Protein MANBAL                                                        | 0.016   | 1.45                            |
| 42. | RCAN3    | Calcipressin-3                                                        | 0.039   | 1.44                            |
| 43. | PDP2     | Mitochondrial pyruvate dehydrogenase-phosphatase 2                    | 0.031   | 1.34                            |
| 44. | MALSU1   | Mitochondrial assembly of ribosomal large subunit protein 1           | 0.049   | 1.33                            |
| 45. | UFD1L    | Ubiquitin recognition factor in ER-associated degradation protein 1   | 0.038   | 1.25                            |
| 46. | HLA-E    | HLA class I histocompatibility antigen, $\alpha$ -chain E             | 0.002   | 1.25                            |
| 47. | NDST2    | Bifunctional heparan sulfate N-deacetylase/N-sulfotransferase 2       | 0.016   | 1.23                            |
| 48. | ZMAT2    | Zinc finger matrin-type protein 2                                     | 0.001   | 1.09                            |
| 49. | MUC1     | Mucin-1                                                               | 0.015   | 1.06                            |
| 50. | CTBS     | Di-N-acetylchitobiase (EC 3.2.1.-)                                    | 0.037   | 1.04                            |
| 51. | ABTB2    | Ankyrin repeat and BTB/POZ domain-containing protein 2                | 0.002   | 0.99                            |
| 52. | LYNX1    | Ly-6/neurotoxin-like protein 1                                        | 0.024   | 0.85                            |
| 53. | DNAJC19  | Mitochondrial import inner membrane translocase subunit TIM14         | 0.008   | 0.82                            |
| 54. | COL4A3BP | Collagen type IV alpha-3-binding protein                              | 0.001   | 0.81                            |
| 55. | TMEM165  | Transmembrane protein 165                                             | 0.014   | 0.80                            |
| 56. | TAX1BP1  | Tax1-binding protein 1                                                | 0.011   | 0.76                            |
| 57. | HSD11B1L | Hydroxysteroid 11-beta-dehydrogenase 1-like protein                   | 0.004   | 0.75                            |
| 58. | TMX2     | Thioredoxin-related transmembrane protein 2                           | 0.045   | 0.66                            |
| 59. | ZNF525   | Zinc finger protein 525                                               | 0.045   | 0.65                            |
| 60. | RAI1     | Retinoic acid-induced protein 1                                       | 0.048   | -0.29                           |
| 61. | ACAD10   | Acyl-CoA dehydrogenase family member 10                               | 0.031   | -0.64                           |
| 62. | MTRF1    | Peptide chain release factor 1, mitochondrial                         | 0.009   | -1.24                           |
| 63. | OXR1     | Oxidation resistance protein 1                                        | 0.009   | -1.47                           |
| 64. | COLEC11  | Collectin-11                                                          | 0.003   | -1.78                           |
| 65. | ABCC3    | Canalicular multispecific organic anion transporter 2                 | 0.019   | -1.80                           |
| 66. | PDE4DIP  | Myomegalin                                                            | 0.001   | -1.86                           |
| 67. | MT-ND1   | Mitochondrially encoded NADH:Ubiquinone Oxidoreductase Core Subunit 1 | 0.022   | -1.86                           |
| 68. | PRPF39   | Pre-mRNA-processing factor 39 (PRP39 homolog)                         | 0.021   | -1.88                           |
| 69. | TRIM45   | Tripartite motif-containing protein                                   | 0.014   | -1.94                           |
| 70. | ZNF169   | Zinc finger protein 169                                               | 0.035   | -1.95                           |

TABLE S1: Transcriptomic analysis of genes with changed expression in senescence of MRC-5 fibroblasts *in vitro* (cont'd).

| No   | Gene ID     | Name                                                | P-value | $\Delta\text{Log}_2$ expression |
|------|-------------|-----------------------------------------------------|---------|---------------------------------|
| 71.  | LAT         | Linker for activation of T-cells family member 1    | 0.037   | -1.95                           |
| 72.  | PPM1N       | Probable protein phosphatase 1N (EC 3.1.3.16)       | 0.010   | -2.09                           |
| 73.  | AMPD3       | AMP deaminase 3                                     | 0.017   | -2.10                           |
| 74.  | NKTR        | NK-tumor recognition protein                        | 0.024   | -2.33                           |
| 75.  | HIST2H2AC   | Histone H2A type 2-C                                | 0.006   | -2.36                           |
| 76.  | COL23A1     | Collagen alpha-1(XXIII) chain                       | 0.014   | -2.41                           |
| 77.  | GOLGA6L9    | Golgin subfamily A member 6-like protein 9          | 0.028   | -2.41                           |
| 78.  | L2HGDH      | L-2-hydroxyglutarate dehydrogenase, mitochondrial   | 0.042   | -2.44                           |
| 79.  | NUTM2G      | NUT family member 2G                                | 0.047   | -2.47                           |
| 80.  | TBC1D3G     | TBC1 domain family member 3G                        | 0.031   | -2.86                           |
| 81.  | ABCC10      | Multidrug resistance-associated protein 7           | 0.026   | -2.89                           |
| 82.  | ADHFE1      | Hydroxyacid-oxoacid transhydrogenase, mitochondrial | 0.022   | -2.92                           |
| 83.  | BCOR        | BCL-6 corepressor                                   | 0.014   | -2.95                           |
| 84.  | FBXL19-AS1  | Long non-coding RNA FBXL19-AS1                      | 0.035   | -2.96                           |
| 85.  | SCARNA13    | Small Cajal Body-Specific RNA 13                    | 0.002   | -2.98                           |
| 86.  | CXCL2       | C-X-C motif chemokine 2                             | 0.000   | -3.04                           |
| 87.  | SLC25A16    | Solute carrier family 25 member 16                  | 0.038   | -3.11                           |
| 88.  | HIST1H4A    | Histone H4                                          | 0.022   | -3.16                           |
| 89.  | SNORD114-26 | Small Nucleolar RNA, C/D Box 11426                  | 0.016   | -3.23                           |
| 90.  | FBXL17      | F-box/LRR-repeat protein 17                         | 0.021   | -3.32                           |
| 91.  | SAP25       | Histone deacetylase complex subunit SAP25           | 0.036   | -3.41                           |
| 92.  | CTSL        | Cathepsin L1                                        | 0.044   | -3.46                           |
| 93.  | SNORD114-17 | Small Nucleolar RNA, C/D Box 114-17                 | 0.035   | -3.51                           |
| 94.  | SNORD114-3  | Small Nucleolar RNA, C/D Box 1143                   | 0.009   | -3.54                           |
| 95.  | MALAT1      | Long non-coding RNA 47                              | 0.036   | -3.78                           |
| 96.  | FOSB        | Protein fosB (G0/G1 switch regulatory protein 3)    | 0.016   | -3.92                           |
| 97.  | CCDC144A    | Coiled-coil domain-containing protein 144A          | 0.003   | -3.93                           |
| 98.  | SMA4        | $\beta$ -Glucuronidase-like protein SMA4            | 0.033   | -4.06                           |
| 99.  | CASKIN2     | Caskin-2 (CASK-interacting protein 2)               | 0.030   | -4.39                           |
| 100. | RPL23AP32   | Ribosomal Protein L23a Pseudogene 32                | 0.043   | -4.43                           |
| 101. | ANKRD36     | Ankyrin repeat domain-containing protein 36A        | 0.046   | -4.62                           |
| 102. | CISH        | Cytokine-inducible SH2-containing protein           | 0.047   | -5.36                           |
| 103. | MIAT        | Long non-coding RNA 66                              | 0.050   | -5.71                           |
| 104. | RNU6ATAC    | U6atac Small Nuclear RNA                            | 0.038   | -5.82                           |
| 105. | SNORD12C    | Small Nucleolar RNA, C/D Box 12C                    | 0.007   | -6.02                           |
| 106. | NAMPT       | Nicotinamide phosphoribosyltransferase (Visfatin)   | 0.028   | -6.27                           |

TABLE S1: Transcriptomic analysis of genes with changed expression in senescence of MRC-5 fibroblasts *in vitro* (cont'd).

Genes listed had expression changes between passages 3 and 11 in MRC-5 fibroblasts. Gene expression changes are rank ordered by  $\log_2$  expression change (highest to lowest). P-values are with Bonferroni-correction applied.

## Legends to supplementary figures

FIGURE S1: Changes in gene expression induced by sulforaphane in early passage, non-senescent MRC-5 cells *in vitro*. Key: + 1  $\mu$ M SFN ( $\circ$ — $\circ$ ) and control, + 0.002% DMSO ( $\bullet$ — $\bullet$ ). (a) CAT ( $P = 0.002$ ), (b) SOD1 ( $P = 0.028$ ), (c) SOD2 ( $P = 1 \times 10^{-4}$ ), (d) FTH1 ( $P = 0.005$ ,  $P' = 0.021$ ), (e) GPX1 ( $P = 5 \times 10^{-5}$ ,  $P'' = 0.024$ ), (f) PRDX1 ( $P' = 0.028$ ), (g) GCLC ( $P = 0.008$ ,  $P' = 0.023$ ), (h) GSTP1 ( $P = 0.006$ ), (i) MRP2 ( $P' = 0.010$ ), (j) FASN ( $P = 0.002$ ), (k) CCL2 ( $P = 0.013$ ), (l) ( $P = 5 \times 10^{-4}$ ), (m) IL1B, (n) IL15, (o) TLR4, (p) NFKB1, (q) NFKB3 ( $P = 0.003$ ,  $P' = 0.015$ ), (r) MMP3 ( $P = 2 \times 10^{-4}$ ), (s) MMP13, (t) SERPINE1 ( $P = 0.002$ ), (u) AKR1C1 ( $P' = 0.013$ ), (v) CDKN1A, (w) ( $P = 1 \times 10^{-5}$ ), (x) ( $P = 0.033$ ), (y) GLO1 ( $P = 0.002$ ), (z) PFKFP4 ( $P = 0.003$ ), (aa) SERPINB2 ( $P = 2 \times 10^{-4}$ ), (ab) ACTB ( $P = 0.002$ ,  $P' = 5 \times 10^{-4}$ ,  $P'' = 0.042$ ), (ac) CLTC ( $P = 0.004$ ) and (ad) GUSB ( $P = 0.012$ ). Data are mean  $\pm$  SD,  $N = 3$ . Significance:  $P$ ,  $P'$  and  $P''$ , significance values for time, SFN treatment and time x SFN treatment effects, respectively.

FIGURE S2: Effect of sulforaphane on end-of-passage gene expression in young and senescent MRC-5 fibroblasts *in vitro*. Key: Solid bars, control; unfilled bars + 1  $\mu$ M SFN. (a) MMP1 ( $P = 0.002$ ,  $P' = 0.002$ ,  $P'' = 2 \times 10^{-4}$ ), (b) COL1A1 ( $P'' = 0.011$ ), (c) MMP3 ( $P = 0.001$ ), (d) MMP13, (e) CDKN1A, (f) SERPINB2 ( $P = 0.002$ ), (g) AKR1C1 ( $P = 2 \times 10^{-4}$ ,  $P' = 0.002$ ,  $P'' = 0.003$ ), (h) HIF1A ( $P'' = 2 \times 10^{-4}$ ), (i) SOD1 ( $P = 0.011$ ), (j) GCLC, (k) GPX1 ( $P = 0.023$ ), (l) MRP2/UGT1A1 ( $P = 0.017$ ), (m) GLO1, (n) MAFG ( $P = 0.007$ ), (o) ELN ( $P = 0.014$ ), (p) TLR4 ( $P = 0.031$ ), (q) NFKB1 ( $P = 0.009$ ,  $P'' = 0.041$ ), (r) NFKB3, (s) GLB1 ( $P = 0.023$ ) and (t) CDKN1A ( $P = 0.022$ ,  $P'' = 0.012$ ). Significance:  $P$ , passage no effect;  $P'$ , +SFN effect; and  $P''$ , passage no x SFN treatment effect.

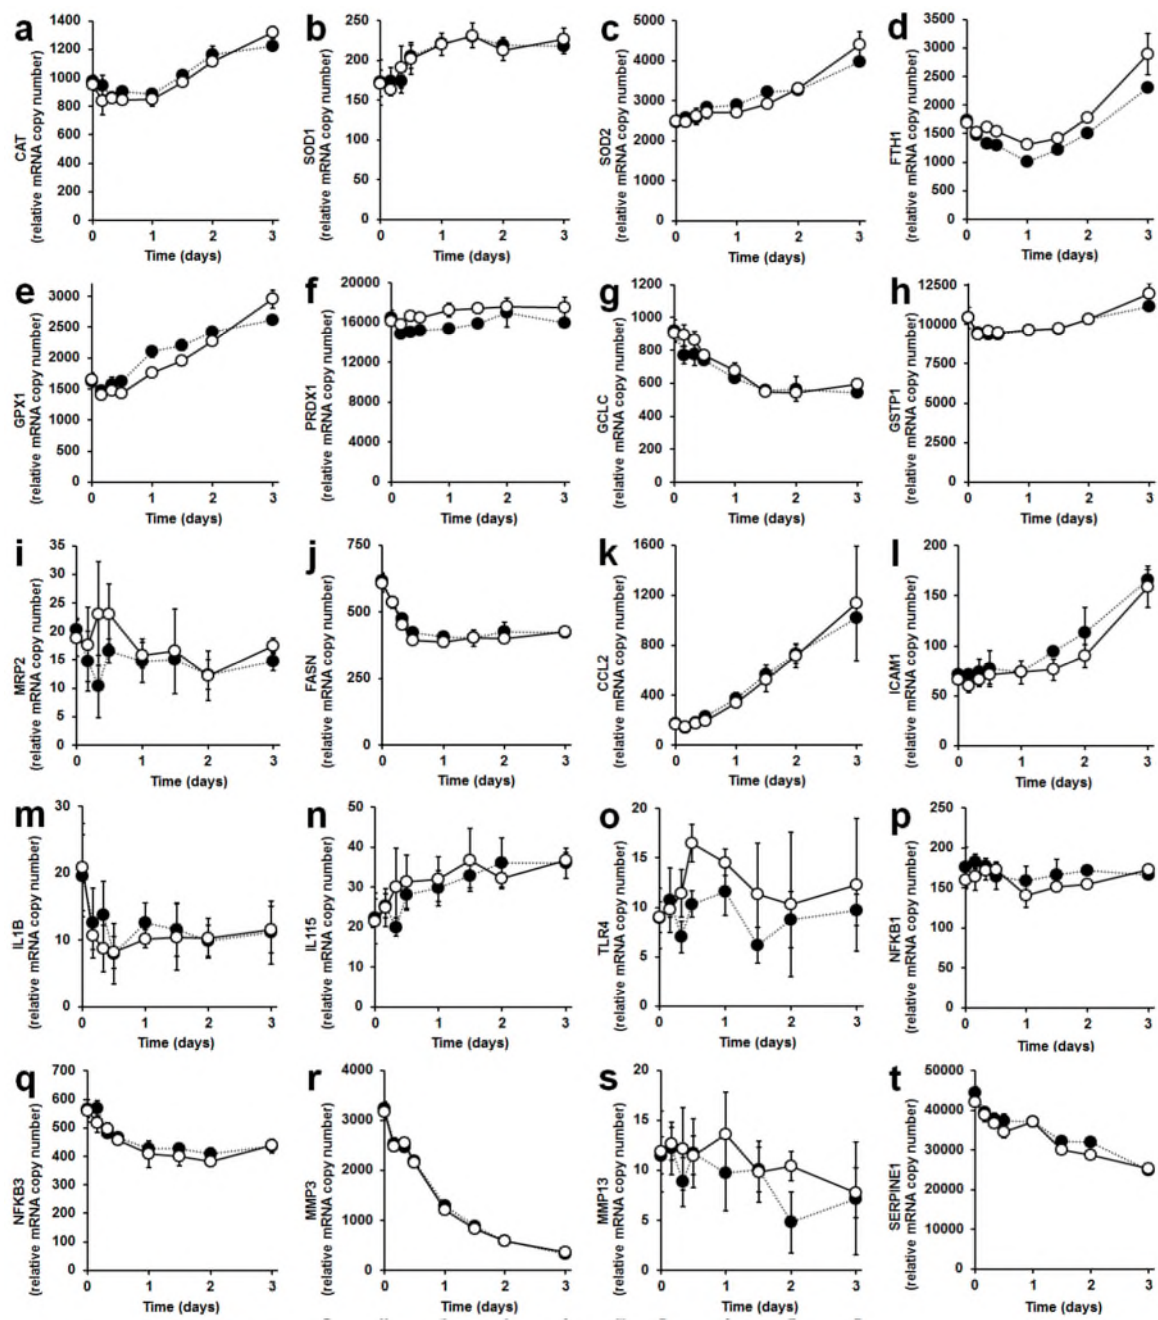

Figure S1

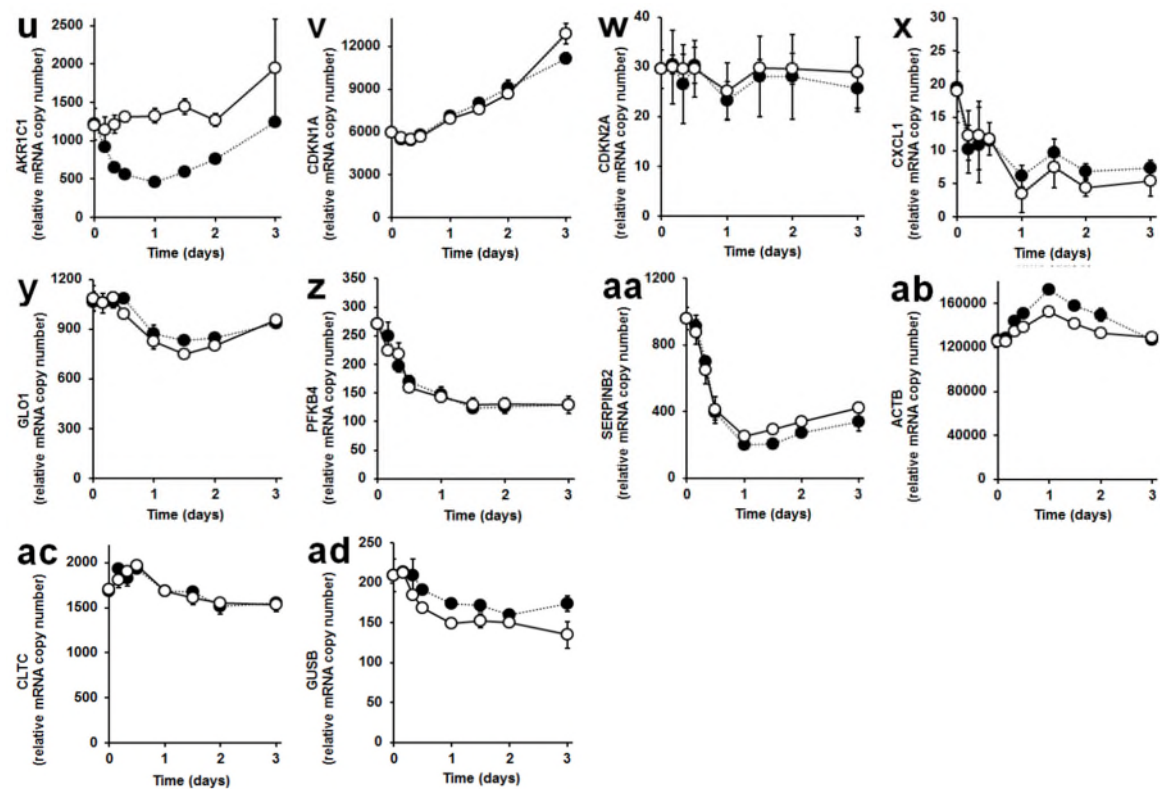

Figure S1 (cont'd)



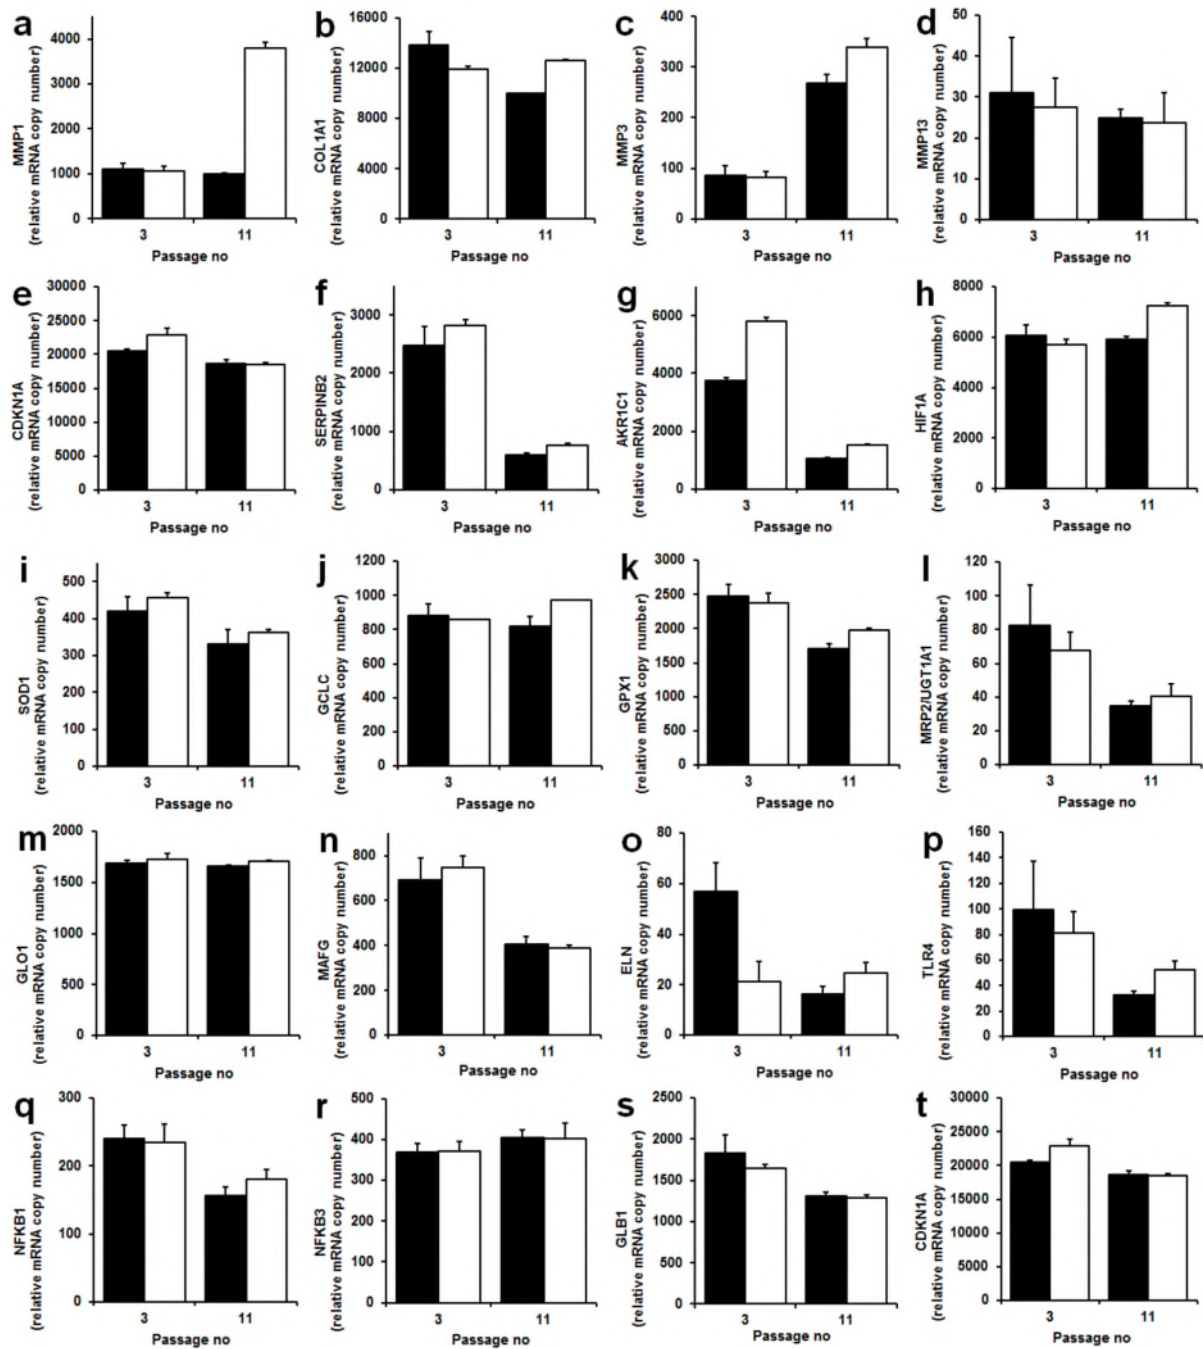

Figure S2
